# Supplementary material
Source: publisher figshare collection journal article supplement (https://acs.figshare.com/ndownloader/files/3808762)

**Figure S1.** The CH<sub>2</sub> stretching region of the IR/FT spectra of the C<sub>14</sub>-Mica-n-m (n=2 and 3; m=0.5, 1, 2, 3 and 10 CEC). The signals are centered at  $2919 \pm 1 \text{ cm}^{-1}$  and  $2849 \pm 1 \text{ cm}^{-1}$ , for  $\nu_{as}$  and  $\nu_s$  vibrational modes respectively.

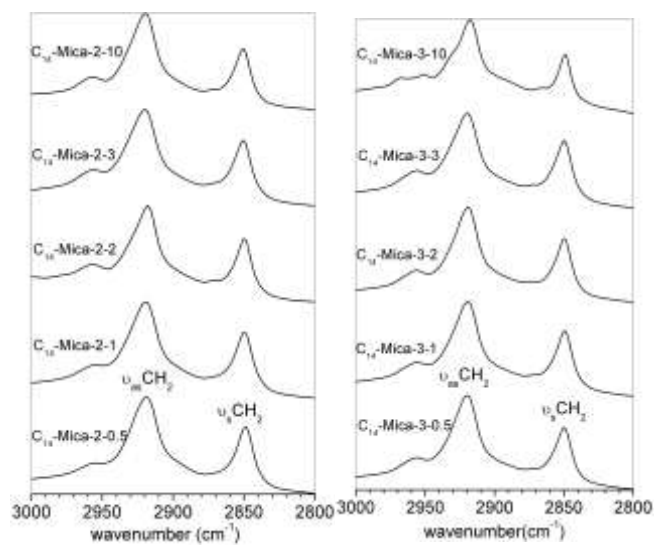

**Figure S2.** The  $^{13}\text{C}$  MAS NMR spectra of the  $\text{C}_{14}$ -Mica-n-m (n=2 and 3; m=0.5, 2 and 10 CEC)

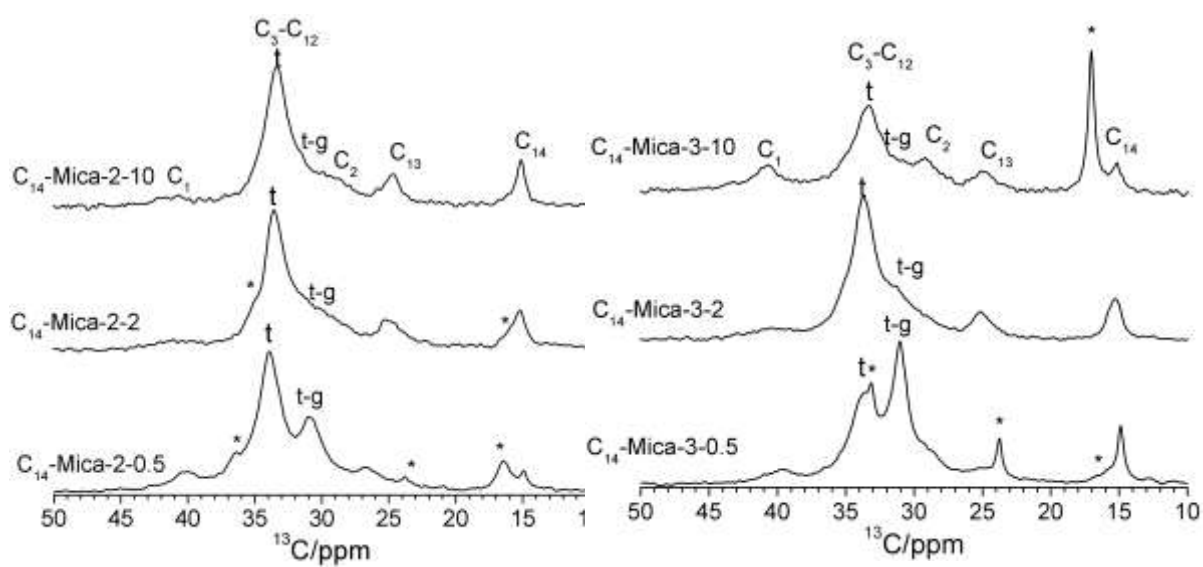

**Figure S3.** The  $^{27}\text{Al}$  MAS NMR spectra of the  $\text{C}_{14}\text{-Mica-}n\text{-}m$  ( $n=2$  and  $3$ ;  $m=0.5, 2$  and  $10$  CEC)

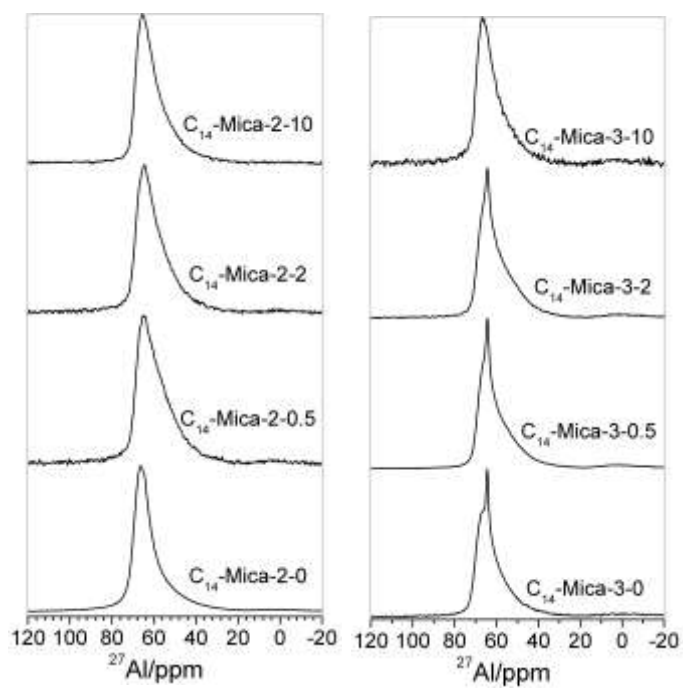

Supplement: Supplementary file 1 [file 3808762]
